# Supplementary material for: Silicon-Induced Tolerance against Arsenic Toxicity by Activating Physiological, Anatomical and Biochemical Regulation in Phoenix dactylifera (Date Palm)
Source: MDPI journal article supplement (doi:10.3390/plants11172263), 2022-08-31

# Silicon Induced Tolerance Against Arsenic Toxicity By Activating Physiological, Anatomical And Biochemical Regulation In *Phoenix dactylifera* (Date Palm)

Taimoor Khan<sup>1</sup>, Saqib Bilal<sup>1\*</sup>, Sajjad Asaf<sup>1</sup>, Safiya Salim Alamri<sup>1</sup>, Muhammad Imran<sup>2</sup>, Abdul Latif Khan<sup>3\*</sup>, Ahmed Al-Rawahi<sup>1</sup>, In-Jung Lee<sup>3</sup> and Ahmed Al-Harrasi<sup>1\*</sup>

Table S1. Details of genes; name, description, product size, reference number, and oligonucleotide sequences used for qRT-PCR.

| Gene name     | Description                                                      | Primer sequence (5'-3')                              |
|---------------|------------------------------------------------------------------|------------------------------------------------------|
| <i>LSi-1</i>  | Low silicon 1 related gene                                       | F: AGTCGATCTCGGTCTCGTCA<br>R: AGCCCCGGAATTAACAGAGC   |
| <i>SOD</i>    | Superoxide dismutase [Fe], chloroplastic                         | F: TGGCTGGCAAAGAGCATGTA R: R: CTCTGAGCCGTTGCTATGTGA  |
| <i>NCED1</i>  | 9-cis-epoxycarotenoid dioxygenase,                               | F: GCCTCCTCGCACCCTATTC<br>R: CGGGTCGATGAAGTTGTTGA    |
| <i>ZEP</i>    | zeaxanthin epoxidase                                             | F: CCACTCTTTCCTCGCCAATC<br>R: GAATCTGGCAATGGGCTTTC   |
| <i>SDR</i>    | Phoenix dactylifera short chain dehydrogenase/reductase          | F: GCTGGTGTTGAAGGGAGGAG<br>R: GGTTTTGTCCGGTGACGAAC   |
| <i>ALMT-1</i> | Phoenix dactylifera aluminum-activated malate transporter 1-like | F: CCGGCGAATTAAGAAGCACG<br>R: TAACGGTGGCCTTGGAATC    |
| <i>ALMT2</i>  | Phoenix dactylifera aluminum-activated malate transporter 1-like | F: GCTCTTTGGTGGCTCTTTTG<br>R: CGAGAATATGTGGCCATTCC   |
| <i>PPMA-3</i> | Phoenix dactylifera plasma membrane ATPase-3                     | F: TGGATTTCTGCTCACTCCCAC<br>R: CTTCTCTACTGCGGCTGAGGA |
| <i>PPMA-4</i> | Phoenix dactylifera plasma membrane ATPase-4                     | F: TTGAGGTGACGACCAAGAGC<br>R: GAAACCGGCTACAGGACCAA   |
| <i>Act</i>    | Phoenix dactylifera actin                                        | F: ATTCTGCAGGACTGGGAAGC<br>R: CGAACAGGTTGGCTGAATTGT  |

**Supplementary figure S1:** Influence of silicon and arsenic on size of stomata of date palm leaves, screened with Scan Electron Microscope. Silicon treated (Si+) Silicon non-treated (Si-), Silicon and Arsenic (Si+As) and Arsenic treated (As). Three biological replicates were screen for each sample

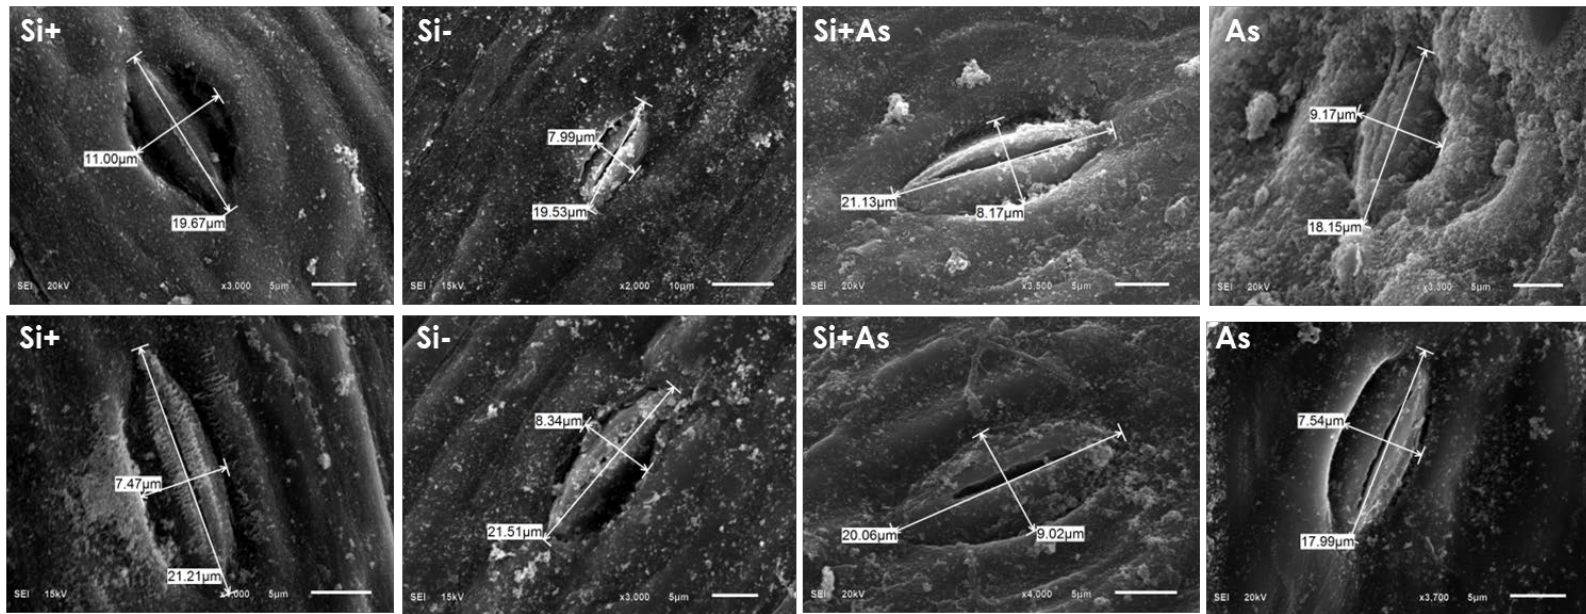

**Supplementary figure S2:** Influence of silicon and arsenic on leaf morphology and anatomy of date palm leaves, screened with Scan Electron Microscope. Silicon treated (Si+) Silicon non-treated (Si-), Silicon and Arsenic (Si+As) and Arsenic treated (As). Three biological replicates were screened for each sample.

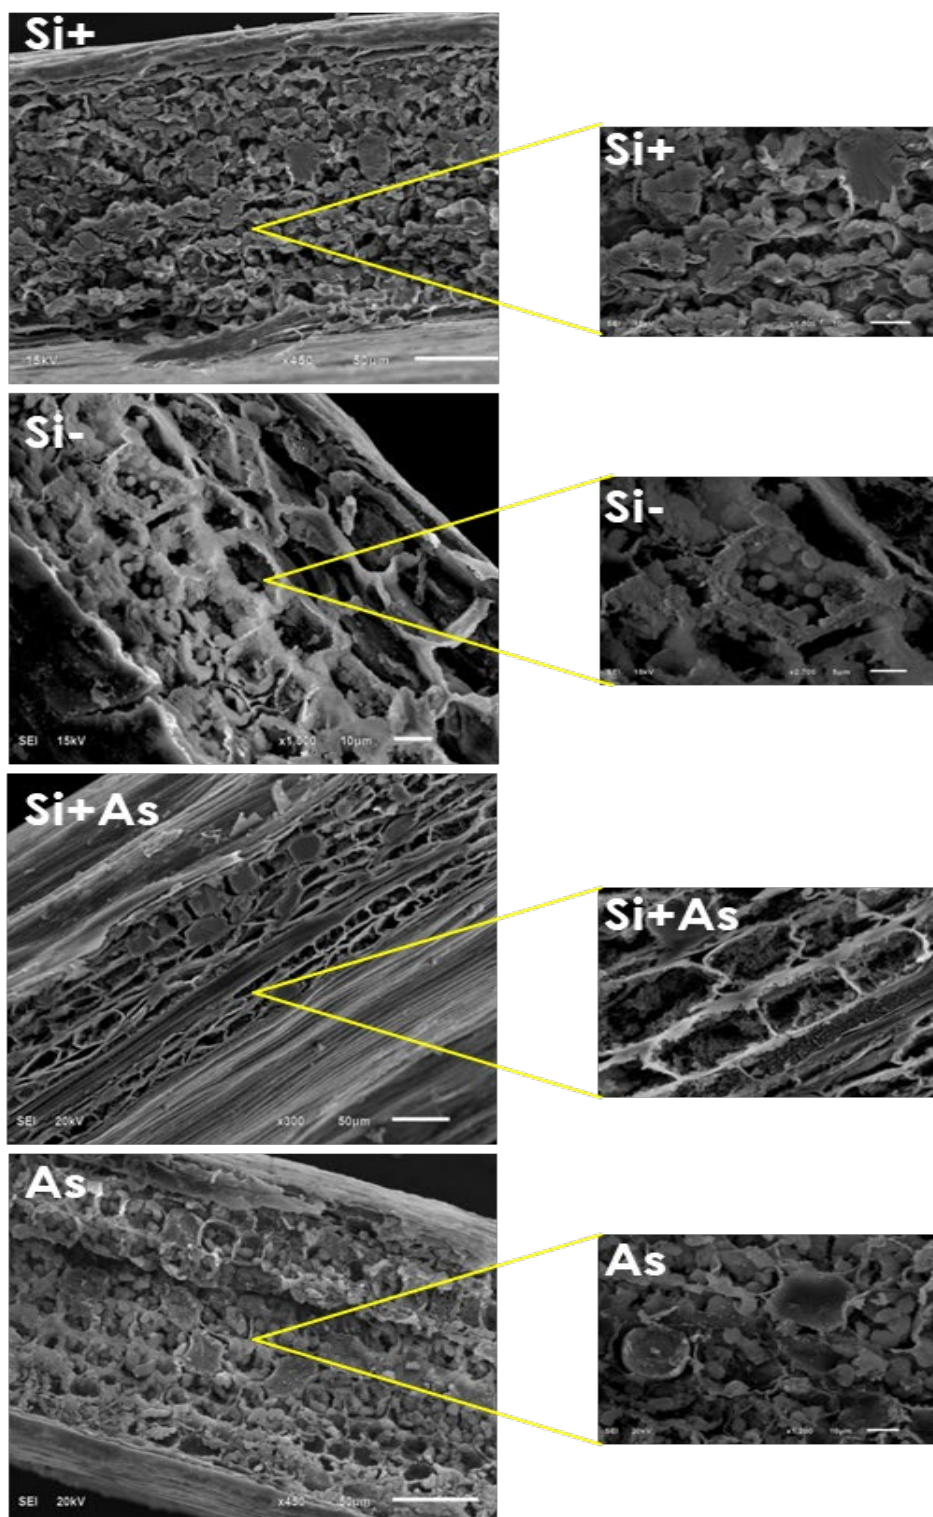

Supplement: s1 [file s1]
